# Supplementary material for: Distance and utilisation of out-of-hours services in a Norwegian urban/rural district: an ecological study
Source: PubMed Central journal article supplement (PMC3703450; doi:10.1186/1472-6963-13-222), 2013-06-17
Supplement: 1472-6963-13-222-S1.pdf [file 1472-6963-13-222-S1.pdf]

|                                                                          | Name of municipality |         |          |             |           |       |          |       |          |          |
|--------------------------------------------------------------------------|----------------------|---------|----------|-------------|-----------|-------|----------|-------|----------|----------|
|                                                                          | Arendal              | Froland | Grimstad | Tvedestrand | Vegårshei | Risør | Gjerstad | Åmli  | Nissedal | Fyresdal |
| <b>Distance from population centroid to casualty clinic (kilometres)</b> | 2.2                  | 14.0    | 20.1     | 28.2        | 37.8      | 46.9  | 52.1     | 59.5  | 95.4     | 133.5    |
| <b>Population 2011</b>                                                   | 42 229               | 5 127   | 20 823   | 5 969       | 1 922     | 6 871 | 2 497    | 1 829 | 1 405    | 1 351    |
| <b>Primary care doctors per 10 000 inhabitants (Mean 2007-2011)</b>      | 5.6                  | 9.0     | 9.3      | 11.0        | 10.2      | 7.3   | 9.8      | 18.1  | 24.3     | 14.1     |
| <b>Population &gt;80 years (2011. %)</b>                                 | 4.5                  | 3.5     | 3.5      | 5.5         | 5.9       | 6.0   | 5.4      | 5.5   | 6.1      | 6.2      |
| <b>Primary school as highest finished education level (%)</b>            | 28.4                 | 33.8    | 26.7     | 29.6        | 28.6      | 30.5  | 39.3     | 34.8  | 30.8     | 27.8     |
| <b>Median gross income 2010 (1 000 NOK)</b>                              | 298                  | 288     | 293      | 275         | 281       | 268   | 264      | 264   | 275      | 277      |
| <b>Income inequality (Gini coefficient) 2009</b>                         | 0.22                 | 0.21    | 0.27     | 0.21        | 0.20      | 0.22  | 0.19     | 0.21  | 0.20     | 0.19     |
