# Supplementary material for: Distance and utilisation of out-of-hours services in a Norwegian urban/rural district: an ecological study
Source: PubMed Central journal article supplement (PMC3703450; doi:10.1186/1472-6963-13-222), 2013-06-17
Supplement: 1472-6963-13-222-S3.pdf [file 1472-6963-13-222-S3.pdf]

| <b>Age group</b> | <b>0-5 years</b> | <b>6-12 years</b> | <b>13-19 years</b> | <b>20 - 34 years</b> | <b>35-49 years</b> | <b>Rate 50-66 years</b> | <b>67-79 years</b> | <b>80 years</b> |
|------------------|------------------|-------------------|--------------------|----------------------|--------------------|-------------------------|--------------------|-----------------|
| <b>Pearson r</b> | 0.051            | 0.131             | -0.654             | -0.475               | 0.231              | 0.105                   | 0.652              | 0.510           |
| <b>p</b>         | 0.728            | 0.363             | <0.001             | <0.001               | 0.107              | 0.470                   | <0.001             | <0.001          |
