# Supplementary material for: Distance and utilisation of out-of-hours services in a Norwegian urban/rural district: an ecological study
Source: PubMed Central journal article supplement (PMC3703450; doi:10.1186/1472-6963-13-222), 2013-06-17
Supplement: 1472-6963-13-222-S5.pdf [file 1472-6963-13-222-S5.pdf]

|                                                       | <b>Constant</b> | <b><math>\beta</math></b> | <b>95% CI for <math>\beta</math></b> | <b>R<sup>2</sup></b> | <b>Pearson r</b> |
|-------------------------------------------------------|-----------------|---------------------------|--------------------------------------|----------------------|------------------|
| <b>Weighted data</b>                                  | 5.54            | -0.016                    | -0.017 to -0.015                     | 0.96                 | -0.98            |
| <b>Distance from population centroid (kilometres)</b> |                 |                           |                                      |                      |                  |
| (Main outcome)                                        |                 |                           |                                      |                      |                  |
| <b>Non-weighted data</b>                              | 5.54            | -0.016                    | -0.017 to -0.015                     | 0.96                 | -0.98            |
| <b>Distance from population centroid (kilometres)</b> |                 |                           |                                      |                      |                  |
