# Supplementary material for: Distance and utilisation of out-of-hours services in a Norwegian urban/rural district: an ecological study
Source: PubMed Central journal article supplement (PMC3703450; doi:10.1186/1472-6963-13-222), 2013-06-17
Supplement: 1472-6963-13-222-S6.pdf [file 1472-6963-13-222-S6.pdf]

|                                                                             | <b>Constant</b> | <b><math>\beta</math></b> | <b>95% CI for <math>\beta</math></b> | <b>R<sup>2</sup></b> | <b>Pearson r</b> |
|-----------------------------------------------------------------------------|-----------------|---------------------------|--------------------------------------|----------------------|------------------|
| <b>Distance from population centroid (kilometres)</b><br><br>(Main outcome) | 5.92            | -0.009                    | -0.010 to -0.009                     | 0.95                 | -0.98            |
| <b>Driving time from population centroid (minutes)</b>                      | 5.79            | -0.008                    | -0.009 to -0.007                     | 0.82                 | -0.91            |
| <b>Distance from Town hall (kilometres)</b>                                 | 5.91            | -0.009                    | -0.010 to 0.009                      | 0.94                 | 0.97             |
