# Supplementary material for: Distance and utilisation of out-of-hours services in a Norwegian urban/rural district: an ecological study
Source: BMC Health Serv Res. 2013 Jun 17;13:222. doi: 10.1186/1472-6963-13-222 (PMC3703450; doi:10.1186/1472-6963-13-222)
Supplement: Additional file 7 — Alternative distance measures and consultation rates. Simple linear regression. Rate of face to face consultations by distance from population centroid of municipalities to Arendal casualty clinic. N = 50. [file 1472-6963-13-222-S7.pdf]

|                                                 | Constant | $\beta$ | 95% CI for $\beta$ | $R^2$ | Pearson r |
|-------------------------------------------------|----------|---------|--------------------|-------|-----------|
| Distance from population centroid (kilometres)  | 5.54     | -0.016  | -0.017 to -0.015   | 0.96  | -0.98     |
| (Main outcome)                                  |          |         |                    |       |           |
| Driving time from population centroid (minutes) | 5.32     | -0.014  | -0.016 to -0.012   | 0.82  | -0.91     |
| Distance from Town hall (kilometres)            | 5.53     | -0.016  | -0.016 to 0.017    | 0.94  | 0.97      |
